# Supplementary material for: Gold–silver nanocomposite-functionalized graphene sensing platform for an electrochemiluminescent immunoassay of a tumor marker
Source: Royal Society of Chemistry journal article supplement (doi:10.1039/c3ra41666f), 2013-01-01
Supplement: c3ra41666f.pdf [file c3ra41666f.pdf]

## Supplemental Information

### **Gold-silver nanocomposite-functionalized graphene sensing platform for electrochemiluminescent immunoassay of tumor marker**

**Yan zhang,<sup>a</sup> Long Li,<sup>b</sup> Hongmei Yang,<sup>a</sup> Ya-nan Ding,<sup>a</sup> Min Su,<sup>a</sup> Jiantao Zhu,<sup>a</sup> Mei Yan,<sup>a</sup>  
Jinghua Yu,<sup>a,\*</sup> Xianrang Song<sup>c</sup>**

<sup>a</sup> *Key Laboratory of Chemical Sensing & Analysis in Universities of Shandong, School of Chemistry and Chemical Engineering, University of Jinan, Jinan 250022 P. R. China  
E-mail: ujn.yujh@gmail.com*

<sup>b</sup> *Shandong Provincial Key Laboratory of Preparation and Measurement of Building Materials, University of Jinan, Jinan 250022, P. R. China*

<sup>c</sup> *Cancer Research Center, Shandong Tumor Hospital, Jinan 250117, P. R. China*

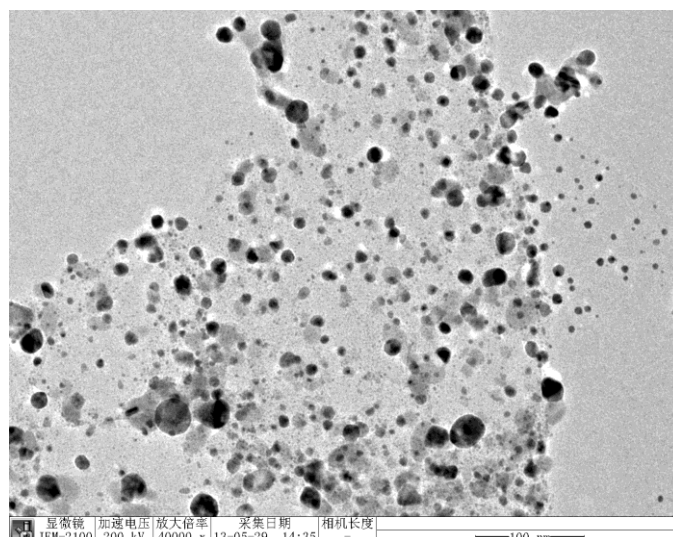

Fig. S1 HRTEM of prepared GN-Ag-Au

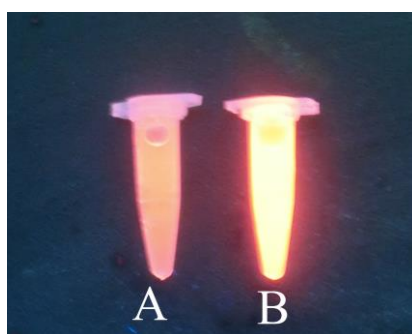

Fig. S2 Photographs of CMs@QDs (A) and QDs (B) under illumination ( $\lambda=365$  nm)

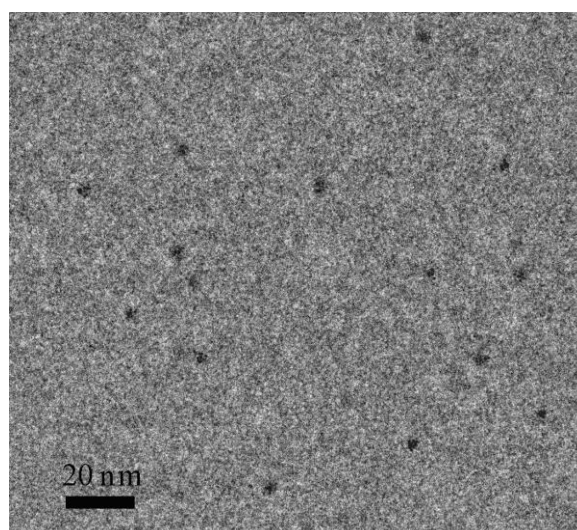

Fig. S3 TEM of prepared CdTe QDs

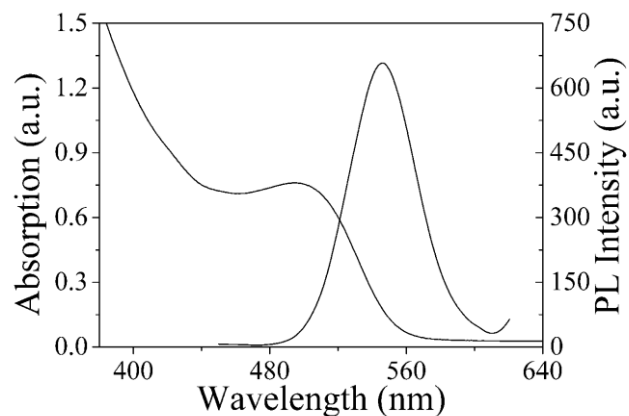

Fig. S4 Absorption and PL spectra of the CdTe QDs

The quantum yield (QY) of the QDs used in this paper are measured to be about 56.0%, by using Rhodamine B as a criterion (QY: 98%, EtOH)<sup>1</sup> at room temperature.

#### Reference

1. C. L. Zhang, X. H. Ji, Y. Zhang, G. H. Zhou, X. L. Ke, H. Z. Wang, P. Tinnefeld, Z. K. He, *Anal. Chem.*, doi.org/10.1021/ac400606e.
